# Supplementary material
Source: PubMed Central journal article supplement (PMC3468928)
Supplement: tlo0505_0393SD1.pdf [file tlo0505_0393SD1.pdf]

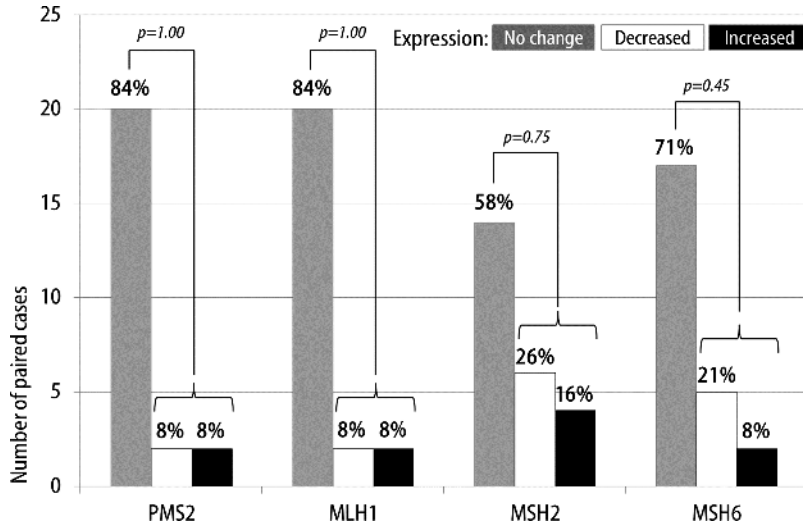

**Figure W1.** Changes in the immunoreactivity of MMR proteins between initial and recurrent glioblastomas in 24 paired cases measured by IHC staining. The changes were nonsignificant for all MMR proteins (McNemar test).

**Table W1.** Summary of MMR Protein Expression (by IHC Staining) in a Total of 24 Paired Cases of Initial and Recurrent Glioblastomas.

| Initial glioblastoma, n (%) | PMS2        | Recurrent Glioblastoma, n (%) |          |          | Identical with Initial Tumor, n (%) |
|-----------------------------|-------------|-------------------------------|----------|----------|-------------------------------------|
|                             |             | 0 or 1+                       | 2+       | 3+       |                                     |
| 0 or 1+                     | 1 (4%)      | 0                             | 1 (4%)   | 20 (84%) |                                     |
| 2+                          | 0           | 0                             | 1 (4%)   |          |                                     |
| 3+                          | 0           | 2 (8%)                        | 19 (80%) |          |                                     |
|                             | <i>MLH1</i> |                               |          |          |                                     |
| 0 or 1+                     | 1 (4%)      | 0                             | 1 (4%)   | 20 (84%) |                                     |
| 2+                          | 0           | 1 (4%)                        | 1 (4%)   |          |                                     |
| 3+                          | 0           | 2 (8%)                        | 18 (76%) |          |                                     |
|                             | <i>MSH2</i> |                               |          |          |                                     |
| 0 or 1+                     | 0           | 2 (8%)                        | 1 (4%)   | 14 (58%) |                                     |
| 2+                          | 0           | 1 (4%)                        | 1 (4%)   |          |                                     |
| 3+                          | 0           | 6 (26%)                       | 13 (54%) |          |                                     |
|                             | <i>MSH6</i> |                               |          |          |                                     |
| 0 or 1+                     | 1 (4%)      | 1 (4%)                        | 0        | 17 (71%) |                                     |
| 2+                          | 0           | 2 (8%)                        | 1 (4%)   |          |                                     |
| 3+                          | 2 (8%)      | 3 (13%)                       | 14 (59%) |          |                                     |
